# Supplementary material for: Sialylated glycoproteins suppress immune cell killing by binding to Siglec-7 and Siglec-9 in prostate cancer
Source: PubMed Central journal article supplement (PMC11645153; doi:10.1172/jci180282), 2024-10-22
Supplement: jci-134-180282-s050.pdf [file jci-134-180282-s050.pdf]

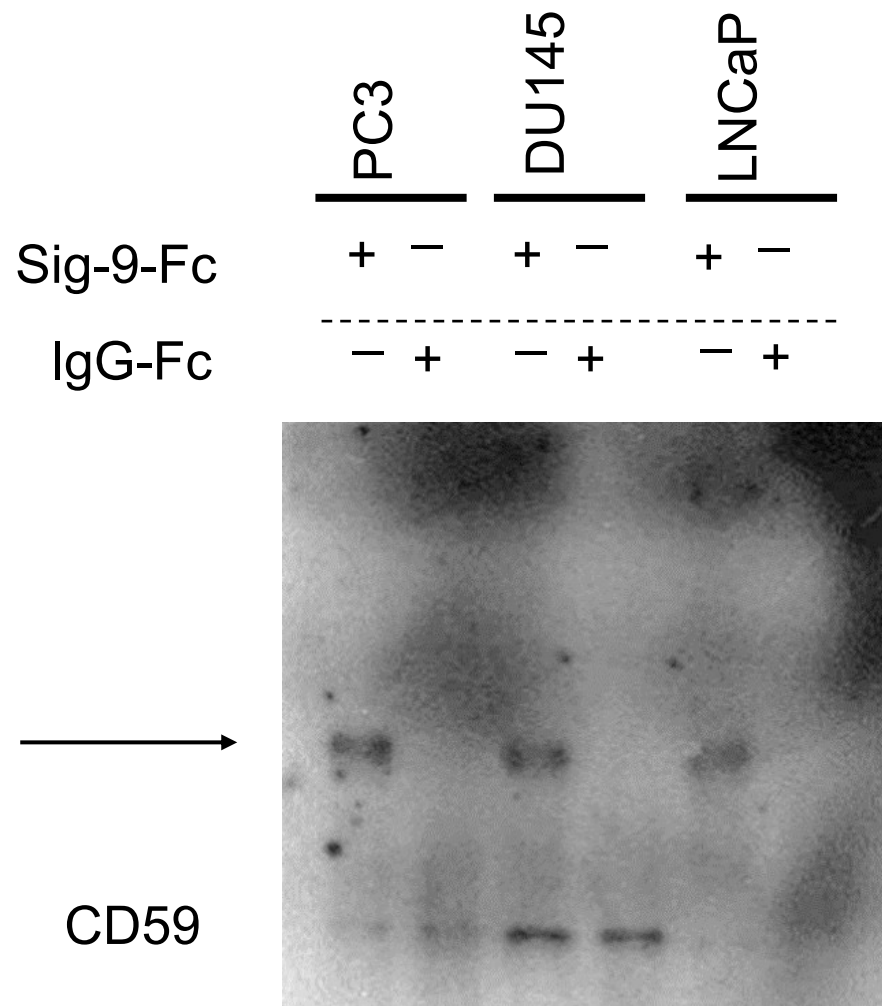

Full unedited gel for Figure 6F

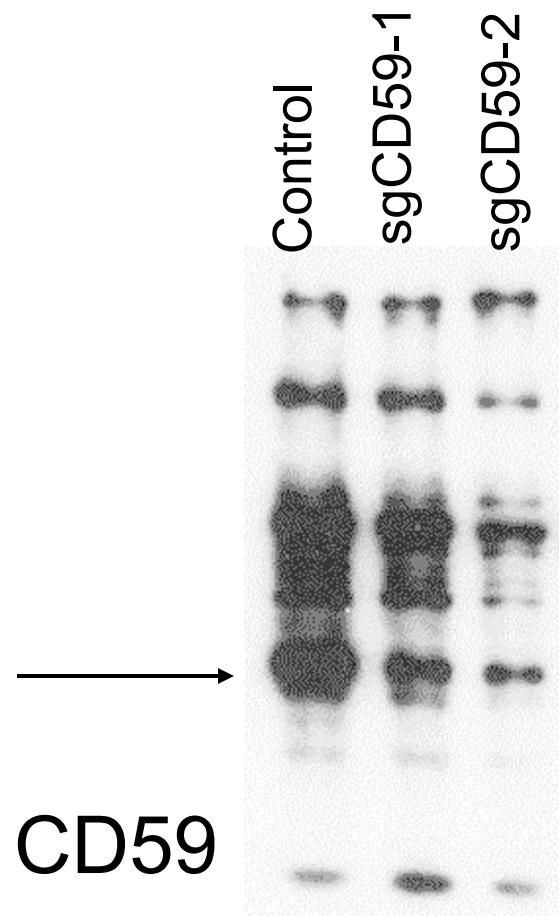

Full unedited gel for Figure 6G

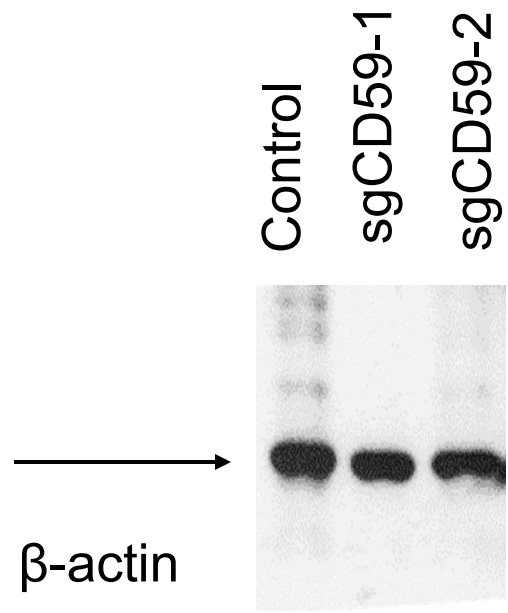

Full unedited gel for Figure 6G
